# Supplementary material for: Sordaria macrospora Sterile Mutant pro34 Is Impaired in Respiratory Complex I Assembly
Source: MDPI journal article supplement (doi:10.3390/jof8101015), 2022-09-27
Supplement: s1 [file s1]

## ***Sordaria macrospora* sterile mutant pro34 is impaired in respiratory complex I assembly**

Andrea Hamann 1, Heinz D. Osiewacz 1 and Ines Teichert 2,\*

1     Institut für Molekulare Biowissenschaften, Goethe-Universität Frankfurt a.M.,  
Frankfurt, Germany

2     Allgemeine und Molekulare Botanik, Ruhr-Universität Bochum, Bochum, Germany

\*     Correspondence: [ines.teichert@rub.de](mailto:ines.teichert@rub.de)

**Table S1:** Strains used in this study.

| Strain name                    | Strain number       | Relevant genotype and phenotype                                          | Reference / source <sup>a</sup> |
|--------------------------------|---------------------|--------------------------------------------------------------------------|---------------------------------|
| Wild type (wt)                 | S133134             | Wild type (wt), fertile                                                  | AMB                             |
| pro1                           | S95333              | pro1, sterile                                                            | [1]                             |
| pro5                           | S35253              | pro5, sterile                                                            | AMB                             |
| pro9                           | S112113             | pro9, sterile                                                            | AMB                             |
| pro11                          | S63625              | pro11, sterile                                                           | [2]                             |
| pro18                          | S28256              | pro18, sterile                                                           | AMB                             |
| pro21                          | S99063              | pro21, sterile                                                           | AMB                             |
| pro22                          | S91606              | pro22, sterile                                                           | [3]                             |
| pro23                          | S93343              | pro23, sterile                                                           | [4]                             |
| pro24                          | S112266             | pro24, sterile                                                           | AMB                             |
| pro30                          | S94233              | pro30, sterile                                                           | [5]                             |
| pro32                          | S94453              | pro32, sterile                                                           | [6]                             |
| pro34                          | S112435,<br>S116034 | pro34, sterile                                                           | AMB                             |
| pro40                          | S95265              | pro40, sterile                                                           | [5]                             |
| pro41                          | S46357              | pro41, sterile                                                           | [7]                             |
| pro42                          | S112477             | pro42, sterile                                                           | AMB                             |
| pro43                          | S99108              | pro43, sterile                                                           | AMB                             |
| pro44                          | S94061              | pro44, sterile                                                           | [8]                             |
| $\Delta$ mak1                  | R8501               | $\Delta$ mak1::hph <sup>r</sup> , sterile                                | [5]                             |
| $\Delta$ mek1                  | S101796             | $\Delta$ mek1::hph <sup>r</sup> , sterile                                | [5]                             |
| $\Delta$ nor1                  | DD574               | $\Delta$ nor1::hph <sup>r</sup> , sterile                                | [6]                             |
| $\Delta$ nox1                  | DD27                | $\Delta$ nox1::hph <sup>r</sup> , sterile                                | [6]                             |
| $\Delta$ pho1                  | ESP1                | $\Delta$ pho1::hph <sup>r</sup> , sterile                                | [9]                             |
| $\Delta$ pro45                 | N161                | $\Delta$ pro45::hph <sup>r</sup> , sterile                               | [10]                            |
| PRO34-NE1<br>PRO34-NE2         | R17456<br>R17474    | pro34, <i>pro34(p)::pro34::trpC(t);</i><br><i>trpC(p)::nat1</i>          | This study                      |
| PRO34-CE1<br>PRO34-CE2         | R17644<br>R17682    | pro34, <i>gpd(p)::pro34::trpC(t);</i><br><i>trpC(p)::nat1</i>            | This study                      |
| PRO34-GFP-CE1<br>PRO34-GFP-CE2 | R15734<br>R15786    | pro34,<br><i>gpd(p)::pro34::egfp::trpC(t);</i><br><i>trpC(p)::nat1</i>   | This study                      |
| PRO34-GFP-NE1<br>PRO34-GFP-NE2 | R17492<br>R17506    | pro34,<br><i>pro34(p)::pro34::egfp::trpC(t);</i><br><i>trpC(p)::nat1</i> | This study                      |
| GFP-PRO34-CE1                  | R15821              | pro34, <i>gpd(p)::egfp::pro34::</i><br><i>trpC(t); trpC(p)::nat1</i>     | This study                      |

<sup>a</sup> AMB, strain collection of General and Molecular Botany, Ruhr-University Bochum, Germany

**Table S2:** Plasmids used in this study.

| Plasmid       | Description                                                                          | Reference  |
|---------------|--------------------------------------------------------------------------------------|------------|
| pDS23         | yeast recombination vector<br><i>gpd(p)::egfp::trpC(t), amp, ura3, trpC(p)::nat1</i> | [11]       |
| pGFP-PRO34-CE | <i>gpd(p)::egfp::pro34:: trpC(t), amp, ura3, trpC(p)::nat1</i>                       | this study |
| pPRO34-CE     | <i>gpd(p)::pro34::trpC(t), amp, ura3, trpC(p)::nat1</i>                              | this study |
| pPRO34-GFP-CE | <i>gpd(p)::pro34::egfp::trpC(t), amp, ura3, trpC(p)::nat1</i>                        | this study |
| pPRO34-GFP-NE | <i>pro34(p)::pro34::egfp::trpC(t), amp, ura3, trpC(p)::nat1</i>                      | this study |
| pPRO34-NE     | <i>pro34(p)::pro34::trpC(t), amp, ura3, trpC(p)::nat1</i>                            | this study |

**Table S3:** Oligonucleotides used in this study.

| Oligonucleotide | sequence (5'- 3')                               |
|-----------------|-------------------------------------------------|
| 2694-01         | ATGCGGTCGCATCATCTGGC                            |
| 2694-01_2       | TTCATCGCAGCTTGACTAACAGCTACATGCGGTCGCATCATCTGG   |
| 2694-02         | TGATGGAGACGGAGTGAAGG                            |
| 2694-03         | ACTCTCGGCATGGACGAGCTGTACAAGATGCGGTCGCATCATCTGG  |
| 2694-04         | TGATGATTTTCAGTAACGTTAAGTGGATCAAGCCTCAAACACCCTG  |
| 2694-05         | TGAACAGCTCCTCGCCCTTGCTCACCATAGCCTCAAACACCCTGG   |
| 2694-07         | ACATCCAGCGTATCCTCACC                            |
| 2694-08         | TGTCGTCGTCGTCTTCGTCG                            |
| 2694-09         | AACGCCAGGGTTTTCCCAGTCACGACGACTCGTAACCAAGCTTGTGC |

**Table S4:** Overview of sexual crosses set up for the identification of allelic mutations. Each cross was set up in triplicate. Numbers of perithecia in the contact region are indicated as follows: +, few perithecia; ++, several perithecia; +++, massive perithecia production. For strain references, see Table S1.

|                  | S95333 | S35253 | S63625 | S28256 | S99063 | S91606 | S93343 | S94233 | S94453 | S95265 | S46357 | S99108 | S94061 | R8501 | S101796 | DD27  | DD574 | ESP1  | N161   |
|------------------|--------|--------|--------|--------|--------|--------|--------|--------|--------|--------|--------|--------|--------|-------|---------|-------|-------|-------|--------|
|                  | pro1   | pro5   | pro11  | pro18  | pro21  | pro22  | pro23  | pro30  | pro32  | pro40  | pro41  | pro43  | pro44  | Δmak1 | Δmek1   | Δnox1 | Δnor1 | Δpho1 | Δpro45 |
| pro9<br>S112113  | ++     | ++     | ++     | ++     | ++     | +      | -      | ++     | -      | ++     | -      | ++     | -      | -     | ++      | -     | +     | -     | -      |
|                  | ++     | ++     | ++     | +      | ++     | +      | -      | ++     | -      | ++     | -      | ++     | -      | -     | ++      | -     | ++    | -     | -      |
|                  | ++     | ++     | ++     | +      | ++     | -      | -      | ++     | -      | +      | -      | ++     | -      | -     | ++      | -     | -     | -     | -      |
| pro24<br>S112266 | ++     | -      | ++     | ++     | ++     | ++     | ++     | -      | -      | +      | +++    | +      | ++     | -     | +       | -     | ++    | -     | -      |
|                  | ++     | +      | ++     | -      | ++     | ++     | ++     | +      | -      | +      | +++    | ++     | ++     | -     | -       | -     | ++    | -     | -      |
|                  | ++     | -      | ++     | ++     | +      | ++     | ++     | +      | +      | +      | +++    | +      | ++     | -     | ++      | -     | ++    | -     | -      |
| pro34<br>S112435 | +++    | +++    | +++    | +++    | +++    | +++    | +++    | +++    | +++    | +++    | +++    | +++    | +++    | +++   | +++     | ++    | +++   | ++    | +++    |
|                  | +++    | +++    | +++    | +++    | +++    | +++    | +++    | +++    | +++    | +++    | +++    | +++    | +++    | +++   | +++     | ++    | +++   | ++    | +++    |
|                  | +++    | +++    | +++    | +++    | +++    | +++    | +++    | +++    | +++    | +++    | +++    | +++    | +++    | +++   | +++     | ++    | +++   | ++    | ++     |
| pro42<br>S112477 | ++     | ++     | ++     | +      | ++     | ++     | ++     | ++     | ++     | ++     | +++    | ++     | -      | -     | ++      | +     | ++    | +     | -      |
|                  | ++     | ++     | ++     | ++     | ++     | ++     | ++     | ++     | ++     | ++     | +++    | ++     | -      | -     | ++      | -     | ++    | +     | -      |
|                  | ++     | ++     | ++     | ++     | ++     | ++     | ++     | ++     | ++     | ++     | +++    | ++     | -      | -     | ++      | -     | ++    | +     | -      |

**Table S5:** Summary of sequence reads and small variants from genome sequencing of mutant pro34 (sample pro34/fus) and wild type (sample wt\_3). For each sample, 40 ascospore isolates were collected. For sample pro34/fus, only brown-spored isolates with the fus background were used.

| Sample                                        | pro34/fus   | wt_3        |
|-----------------------------------------------|-------------|-------------|
| Genotype                                      | pro34       | wild type   |
| Total number of reads                         | 104,291,308 | 108,513,967 |
| Total Mb                                      | 5319        | 5534        |
| No. of reads mapped to reference genome       | 100,132,095 | 105,047,645 |
| % of reads mapped to reference genome         | 96.0        | 96.8        |
| Coverage                                      | 128x        | 134x        |
| Number of small variants with coverage > 40 % | 130         | 146         |
| Number of these with 100 % penetrance         | -           | -           |

**A**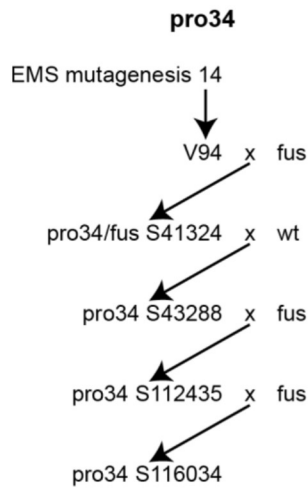**B**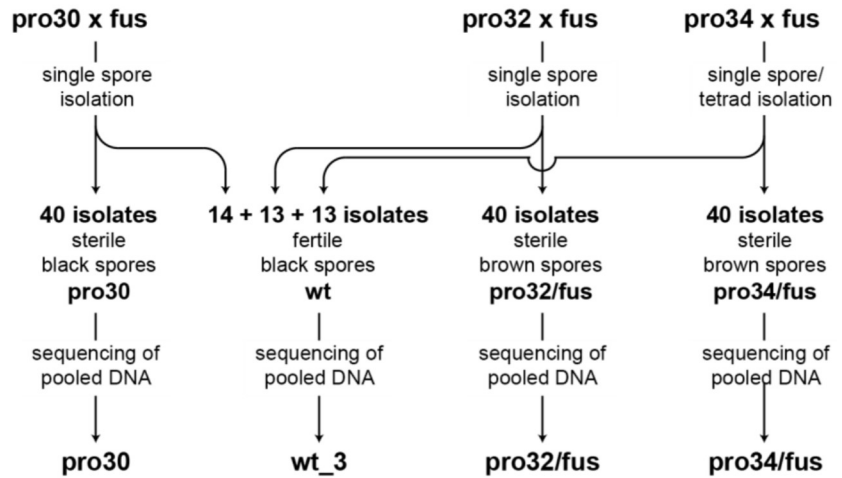

**Figure S1:** Crossing history of strains for pro34 genome sequencing. (A) Crossing history of mutant pro34. Mutant pro34 was generated by ethylmethanesulfate (EMS) mutagenesis and strains were crossed back to spore color mutant fus [4]. (B) Strategy for whole-genome sequencing of pooled DNA from mutants and wildtype. Mutants pro30, pro32, and pro34 were crossed to spore color mutant fus. Single spore isolates derived from black and brown ascospores were screened for fertility and color. For sample pro34/fus, 40 brown single spore isolates with a sterile phenotype were chosen. The pooled DNA from 40 single spore isolates for the pro34 genotype and the wt\_3 genotype was used for sequencing. The wt\_3 sample was already described [6]. Data for pro30 and pro32 have been published [5,6]. Figure S1B from [5].

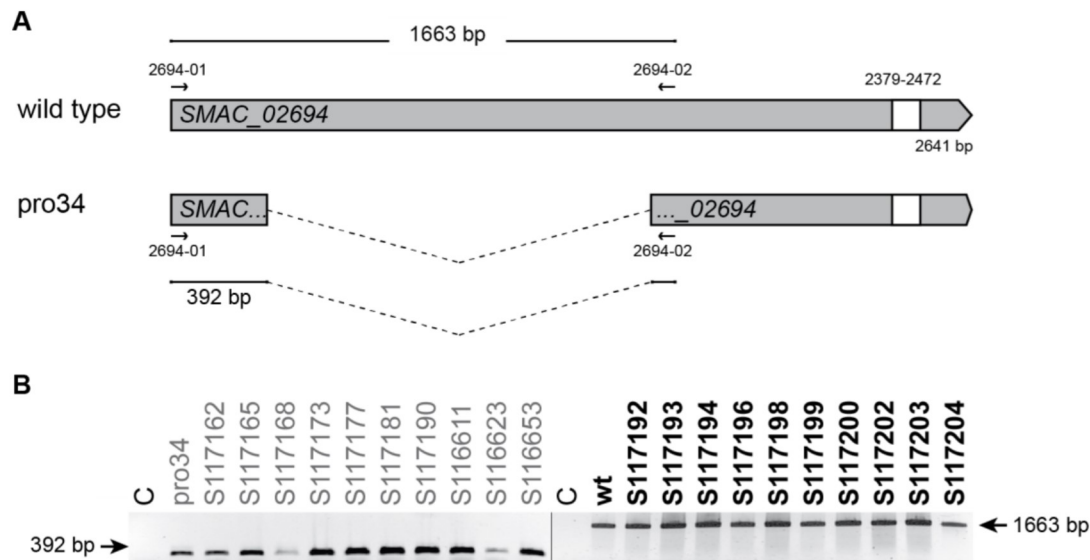

**Figure S2:** Mutant *pro34* harbors a deletion in gene *SMAC\_02694*. (A) Schematic representation of the *pro34* ORF (*SMAC\_02694*) in wild type and mutant *pro34*. ORFs and introns are depicted by gray arrows and white boxes, respectively. Black arrows and lines denote primers and PCR fragments. Dashed lines indicate sequences deleted in the mutant. (B) The sterile phenotype co-segregates with the deletion in *pro34* in progeny of a *pro34* to *fus* cross. PCR was performed with primers given in (A). Grey and bold letters indicate sterile and fertile strains, respectively. C, water control; wt, wild type.



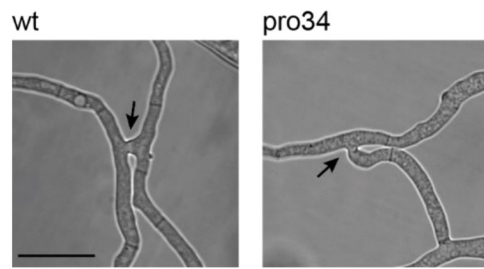

**Figure S3:** Mutant pro34 is able to undergo hyphal fusion. Wild type and pro34 were analyzed for hyphal fusion after two days of growth. Hyphal fusion bridges are indicated by arrows. Scale bar, 20  $\mu\text{m}$ .

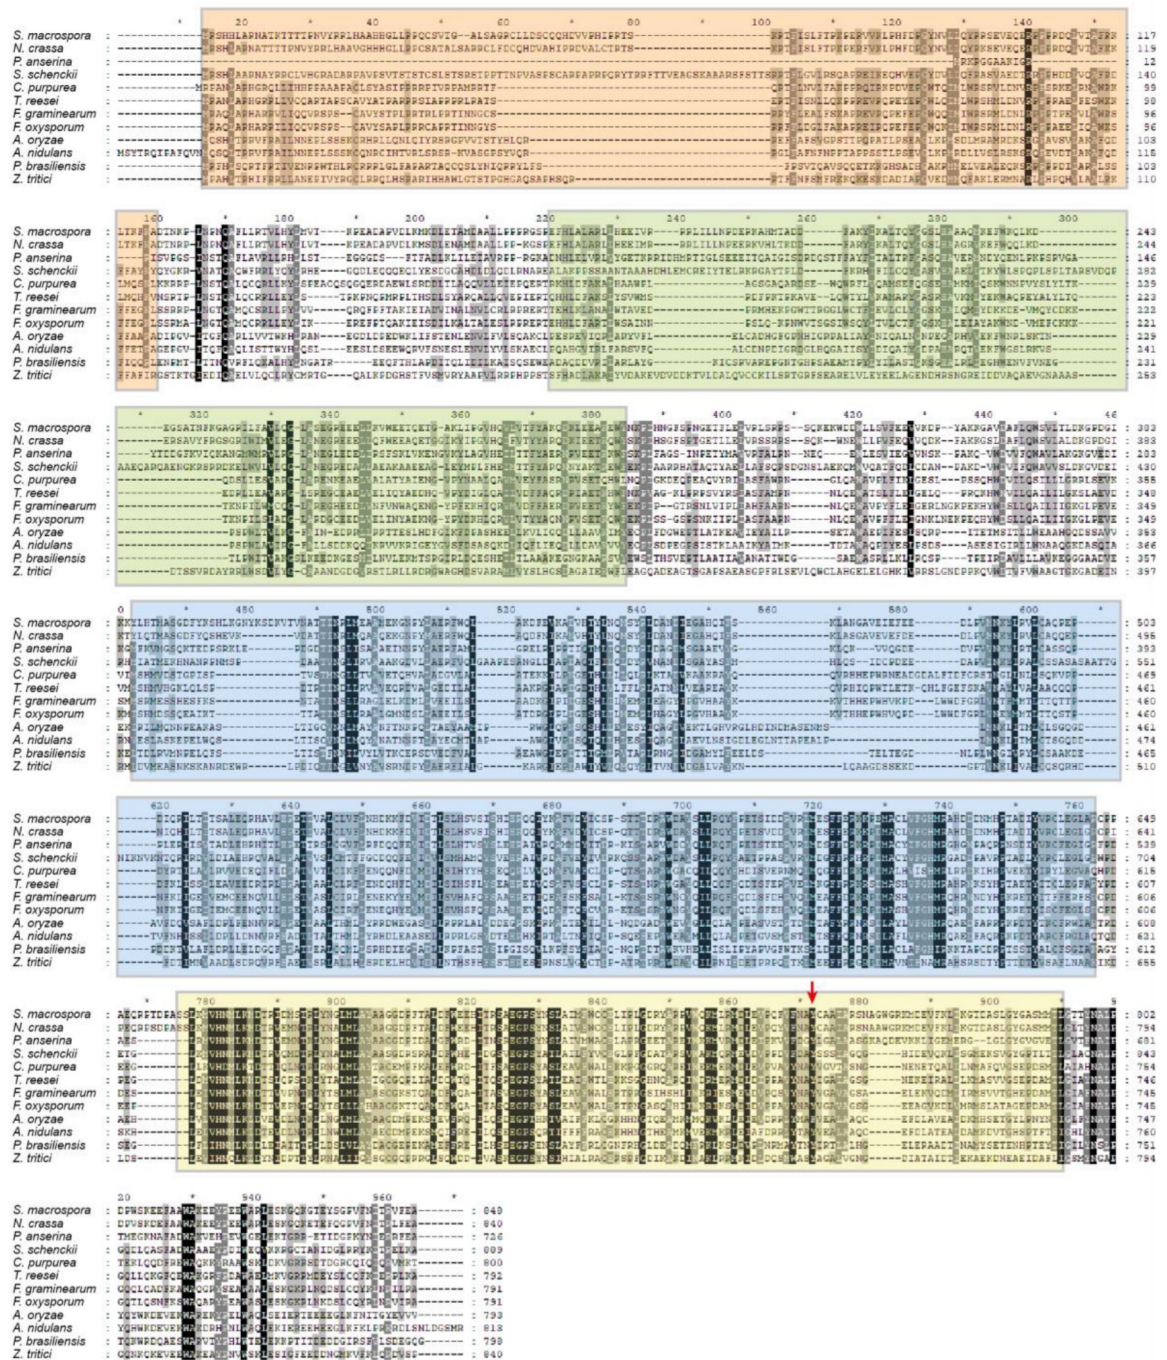

**Figure S4:** Amino acid alignment of PRO34 and CIA84 homologs. Protein sequences were searched for at [fungidb.org](http://fungidb.org) [12] and can be found in the NCBI database for *Aspergillus nidulans* (CBF79406.1), *A. oryzae* (XP\_001819210.1), *Claviceps purpurea* (CCE32056.1), *Fusarium graminearum* (CEF75585.1), *F. oxysporum* (EWZ36992.1), *Neurospora crassa* (CEF75585.1), *Paracoccidioides brasiliensis* (EEH47744.2), *Podospora anserina* (CDP25152.1), *Sordaria macrospora* (CCC10115.1), *Sporothrix schenckii* (KJR86726.1) and *Trichoderma reesei* (EGR45590.1), and from UniParc for *Zymoseptoria tritici* (UPI0013090055). Shaded boxes indicate four globular domains predicted for *S. macrospora* PRO34 by the eukaryotic linear motif (ELM) resource [13]. The red arrow indicates the tyrosine in the PRO34 sequence that is exchanged to cytosine by translation of edited transcripts.

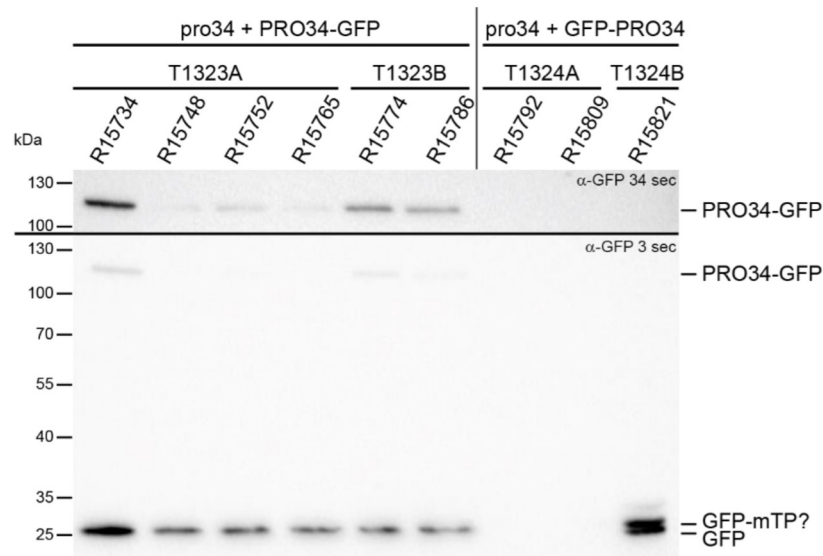

**Figure S5:** Western blot analysis of pro34 transformants carrying C- or N-terminally GFP-tagged PRO34. Full-length PRO34-GFP was only detectable in strains carrying C-terminally tagged PRO34. Only free GFP and a possible GFP-mTP fusion protein were detected in strain R15821, carrying N-terminally tagged PRO34. Molecular weight in kDa is given at the left. “R” designates ascospore isolates generated from the indicated primary transformants (T). Strains R15734 (PRO34-GFP-CE1), R15786 (PRO34-GFP-CE2) and R15821 (GFP-PRO34-CE1) were chosen for further analysis. mTP, mitochondrial targeting peptide.



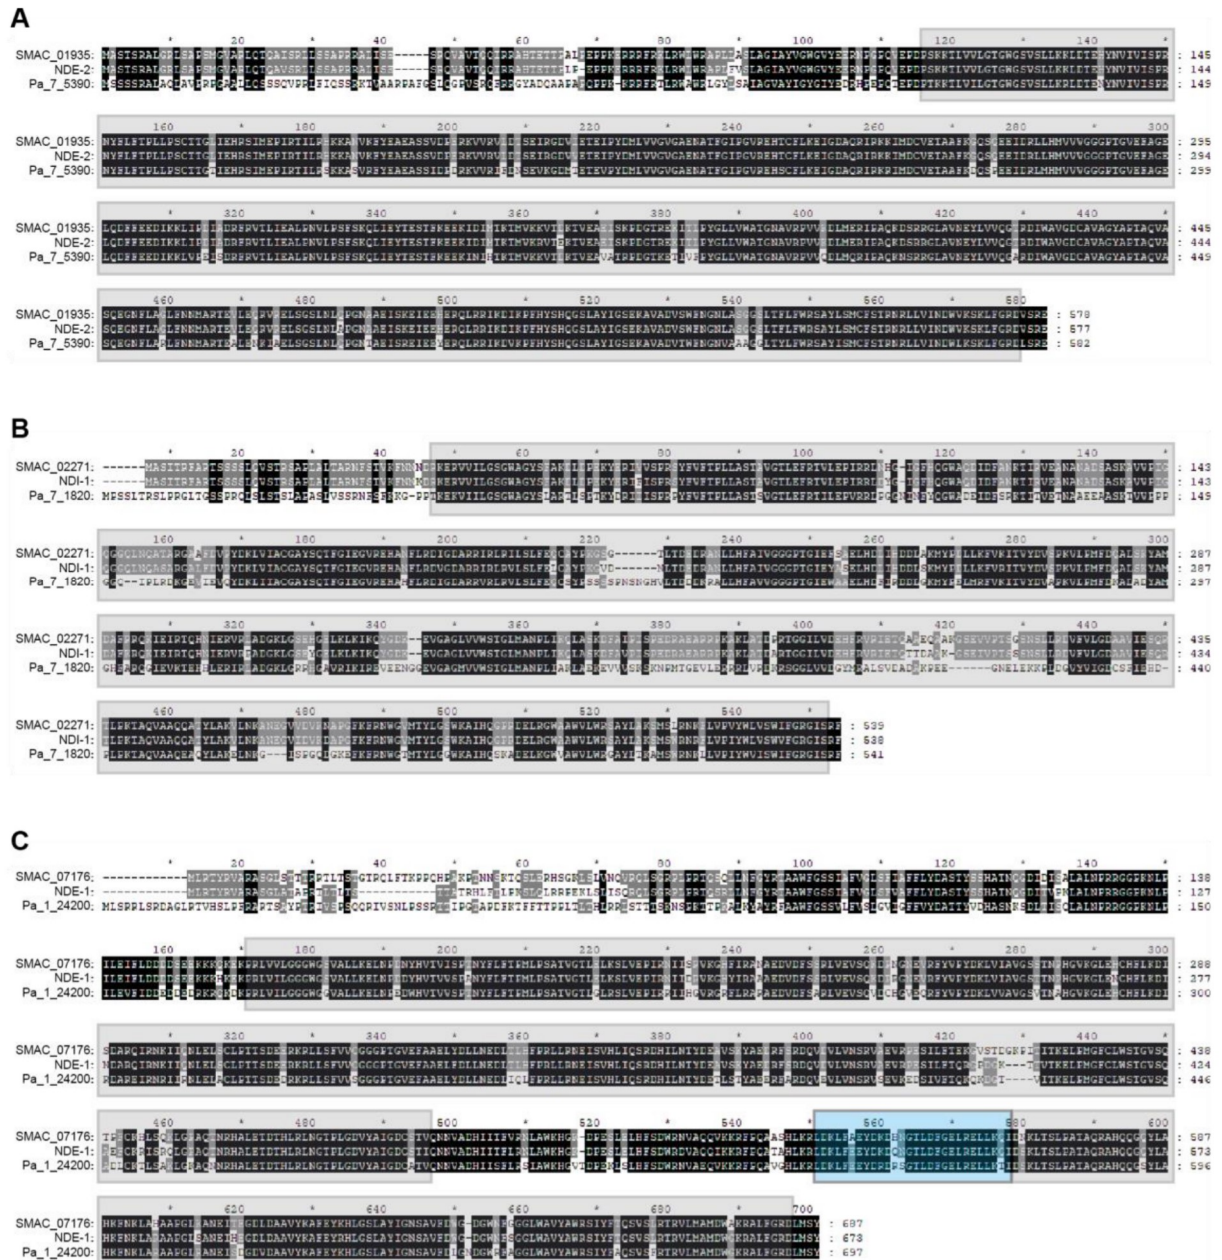

**Figure S6:** Alternative NADH dehydrogenases from *Sordaria macrospora*. The *S. macrospora* genome encodes three putative alternative NADH dehydrogenases (aNADH-DHs). Amino acid alignments are shown of SMAC\_01935, SMAC\_02271 and SMAC\_07176 to their *N. crassa* and *P. anserina* orthologs [14-17]. Sequences were obtained from fungidb.org [12] for *N. crassa* and *S. macrospora*. *P. anserina* sequences can be found in the NCBI database for NDE-1 and NDE-2 orthologs. The sequence for SMAC\_02271 was re-annotated according to transcriptome data. (A) Alignment of SMAC\_01935 to *N. crassa* NDE-2 (NCU08980) and *P. anserina* Pa\_7\_5390. (B) Alignment of SMAC\_02271 to *N. crassa* NDI-1 (NCU00153) and *P. anserina* NDI1 (Pa\_7\_1820). (C) Alignment of SMAC\_07176 to *N. crassa* NDE-1 (NCU05225) and *P. anserina* Pa\_1\_24200. Grey boxes indicate NADH dehydrogenase domains, the blue box indicates an EF-hand domain. Domains were annotated for *S. macrospora* protein sequences according to the NCBI BLAST conserved domain search [18].

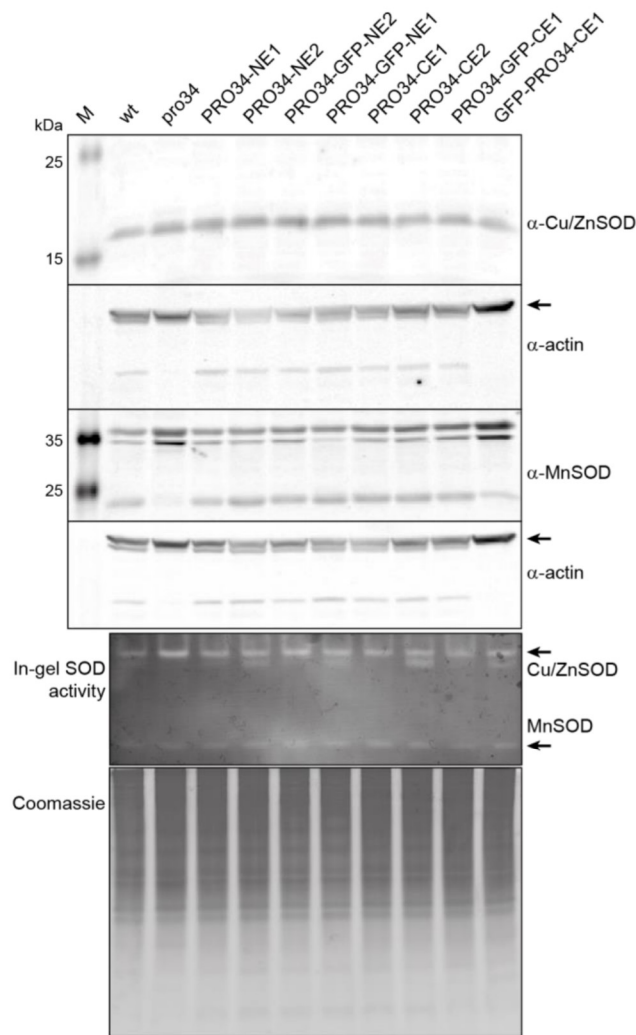

**Figure S7:** Superoxide dismutase (SOD) levels and SOD activity. For western blot analysis, 100  $\mu$ g of total protein from the indicated strains was subjected to 12 % SDS-PAGE. Antibodies raised against Cu/ZnSOD and PaSOD2 (MnSOD) were used to detect *S. macrospora* SODs. An  $\alpha$ -actin antibody served as control. Actin is indicated by arrows. For in-gel SOD activity staining, 100  $\mu$ g total protein were subjected to 10 % native PAGE. The different SODs are indicated by arrows. Coomassie staining is shown as control.

## References

1. Masloff, S.; Pöggeler, S.; Kück, U. The *pro1*(+) gene from *Sordaria macrospora* encodes a C-6 zinc finger transcription factor required for fruiting body development. *Genetics* **1999**, *152*, 191-199.
2. Pöggeler, S.; Kück, U. A WD40 repeat protein regulates fungal cell differentiation and can be replaced functionally by the mammalian homologue striatin. *Eukaryot Cell* **2004**, *3*, 232-240.
3. Bloemendal, S.; Lord, K.M.; Rech, C.; Hoff, B.; Engh, I.; Read, N.D.; Kück, U. A mutant defective in sexual development produces aseptate ascogonia. *Eukaryot Cell* **2010**, *9*, 1856-1866, doi:10.1128/EC.00186-10.
4. Nowrousian, M.; Teichert, I.; Masloff, S.; Kück, U. Whole-genome sequencing of *Sordaria macrospora* mutants identifies developmental genes. *G3 (Bethesda)* **2012**, *2*, 261-270, doi:10.1534/g3.111.001479.
5. Teichert, I.; Steffens, E.K.; Schnass, N.; Fränzel, B.; Krisp, C.; Wolters, D.A.; Kück, U. PRO40 is a scaffold protein of the cell wall integrity pathway, linking the MAP kinase module to the upstream activator protein kinase C. *PLoS Genet* **2014**, *10*, e1004582, doi:10.1371/journal.pgen.1004582.
6. Dirschnabel, D.E.; Nowrousian, M.; Cano-Dominguez, N.; Aguirre, J.; Teichert, I.; Kück, U. New insights into the roles of NADPH oxidases in sexual development and ascospore germination in *Sordaria macrospora*. *Genetics* **2014**, *196*, 729-744, doi:10.1534/genetics.113.159368.
7. Nowrousian, M.; Frank, S.; Koers, S.; Strauch, P.; Weitner, T.; Ringelberg, C.; Dunlap, J.C.; Loros, J.J.; Kück, U. The novel ER membrane protein PRO41 is essential for sexual development in the filamentous fungus *Sordaria macrospora*. *Mol Microbiol* **2007**, *64*, 923-937.
8. Schumacher, D.I.; Lütkenhaus, R.; Altegoer, F.; Teichert, I.; Kück, U.; Nowrousian, M. The transcription factor PRO44 and the histone chaperone ASF1 regulate distinct aspects of multicellular development in the filamentous fungus *Sordaria macrospora*. *BMC Genet* **2018**, *19*, 112, doi:10.1186/s12863-018-0702-z.
9. Bernhards, Y.; Pöggeler, S. The phocein homologue SmMOB3 is essential for vegetative cell fusion and sexual development in the filamentous ascomycete *Sordaria macrospora*. *Curr Genet* **2011**, *57*, 133-149, doi:10.1007/s00294-010-0333-z.
10. Nordzieke, S.; Zobel, T.; Fränzel, B.; Wolters, D.A.; Kück, U.; Teichert, I. A fungal sarcolemmal membrane-associated protein (SLMAP) homolog plays a fundamental role in development and localizes to the nuclear envelope, endoplasmic reticulum, and mitochondria. *Eukaryot Cell* **2015**, *14*, 345-358, doi:10.1128/EC.00241-14.
11. Klix, V.; Nowrousian, M.; Ringelberg, C.; Loros, J.J.; Dunlap, J.C.; Pöggeler, S. Functional characterization of MAT1-1-specific mating-type genes in the homothallic ascomycete *Sordaria macrospora* provides new insights into essential and nonessential sexual regulators. *Eukaryot Cell* **2010**, *9*, 894-905, doi:10.1128/EC.00019-10.
12. Basenko, E.Y.; Pulman, J.A.; Shanmugasundram, A.; Harb, O.S.; Crouch, K.; Starns, D.; Warrenfeltz, S.; Aurrecochea, C.; Stoeckert, C.J., Jr.; Kissinger, J.C.; et al. FungiDB: An Integrated Bioinformatic Resource for Fungi and Oomycetes. *J Fungi (Basel)* **2018**, *4*, doi:10.3390/jof4010039.
13. Kumar, M.; Gouw, M.; Michael, S.; Samano-Sanchez, H.; Pancsa, R.; Glavina, J.; Diakogianni, A.; Valverde, J.A.; Bukirova, D.; Calyseva, J.; et al. ELM-the eukaryotic linear motif resource in 2020. *Nucleic Acids Res* **2020**, *48*, D296-D306, doi:10.1093/nar/gkz1030.

14. Carneiro, P.; Duarte, M.; Videira, A. The external alternative NAD(P)H dehydrogenase NDE3 is localized both in the mitochondria and in the cytoplasm of *Neurospora crassa*. *J Mol Biol* **2007**, *368*, 1114-1121, doi:10.1016/j.jmb.2007.02.080.
15. Teichert, I.; Wolff, G.; Kück, U.; Nowrousian, M. Combining laser microdissection and RNA-seq to chart the transcriptional landscape of fungal development. *BMC Genomics* **2012**, *13*, 511, doi:10.1186/1471-2164-13-511.
16. Videira, A.; Duarte, M. From NADH to ubiquinone in *Neurospora* mitochondria. *Biochim Biophys Acta* **2002**, *1555*, 187-191, doi:10.1016/s0005-2728(02)00276-1.
17. Maas, M.F.; Sellem, C.H.; Krause, F.; Dencher, N.A.; Sainsard-Chanet, A. Molecular gene therapy: overexpression of the alternative NADH dehydrogenase NDI1 restores overall physiology in a fungal model of respiratory complex I deficiency. *J Mol Biol* **2010**, *399*, 31-40, doi:10.1016/j.jmb.2010.04.015.
18. Marchler-Bauer, A.; Bo, Y.; Han, L.; He, J.; Lanczycki, C.J.; Lu, S.; Chitsaz, F.; Derbyshire, M.K.; Geer, R.C.; Gonzales, N.R.; et al. CDD/SPARCLE: functional classification of proteins via subfamily domain architectures. *Nucleic Acids Res* **2017**, *45*, D200-D203, doi:10.1093/nar/gkw1129.
